# Supplementary material for: Finite temperature behavior of carbon atom-doped silicon clusters: depressed thermal stabilities, coexisting isomers, reversible dynamical pathways and fragmentation channels
Source: Royal Society of Chemistry journal article supplement (doi:10.1039/d0nj04515b), 2021-01-01
Supplement: d0nj04515b1.pdf [file d0nj04515b1.pdf]

## Supporting Information

### Finite Temperature Behavior of Carbon Atom Doped Silicon Clusters: Depressed Thermal Stabilities, Co-existing isomers, Reversible Dynamical Pathways and Fragmentation Channels.

Krati Joshi<sup>a‡</sup>, Ashakiran Maibam<sup>b‡</sup>, Sailaja Krishnamurty<sup>\*b‡</sup>

<sup>a</sup>Functional Materials Division, CSIR-Central Electrochemical Research Institute, Karaikudi-630 006, India

<sup>b</sup>Physical and Materials Division, CSIR-National Chemical Laboratory, Pune 411 008, India

<sup>‡</sup>Academy of Scientific and Innovative Research, CSIR-Human Resource Development Centre (CSIR-HRDC) Campus, Postal Staff College area, Gaziabad, 201 002, Uttar Pradesh, India

#### Author Information:

Corresponding author: Sailaja Krishnamurty, e-mail:- sailaja.raaj@gmail.com

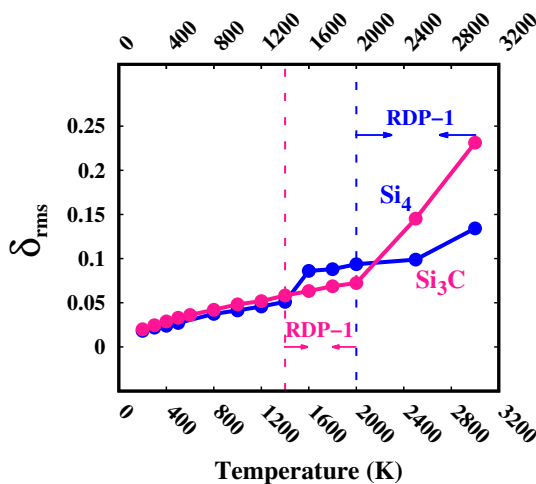

Figure S1.  $\delta_{rms}$  values for Si<sub>3</sub>C and Si<sub>4</sub> clusters at various finite temperatures.

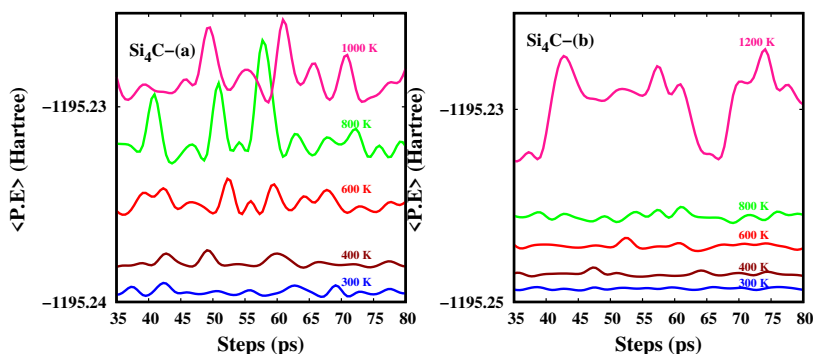

Figure S2. Short-time (1000 steps) averaged potential energies for Si<sub>4</sub>C-a and Si<sub>4</sub>C-b clusters

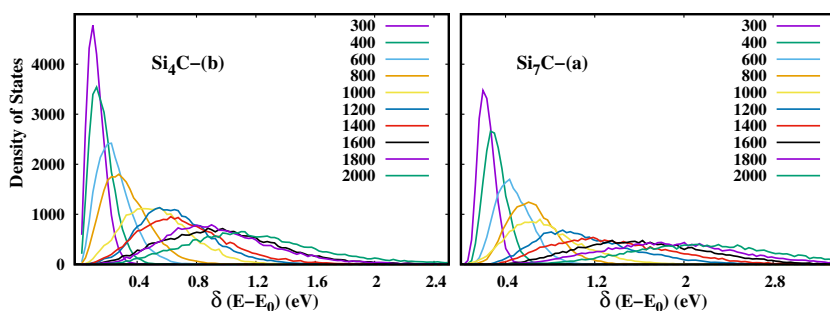

Figure S3. Multi-histograms representing the “density of states” or “probability distribution of potential energies” for  $\text{Si}_4\text{C-b}$  and  $\text{Si}_7\text{C-a}$  clusters

Figure S3 presents the multi-histograms representing the “density of states” or “probability distribution of potential energies” as a function of temperature for  $\text{Si}_4\text{C-b}$  and  $\text{Si}_7\text{C-a}$  clusters. In case of  $\text{Si}_4\text{C-b}$ , the histogram curve of 300 temperature accesses configurations having energies between 0.05 to 0.38 eV. This energy range has appreciable overlap with curves of 400-800 K temperatures, slight overlap with 1000-1400 K and negligible overlap with the 1600-2000 K curves. On the other hand, in case of  $\text{Si}_7\text{C-a}$ , the curves of 400 K and 600 K have significant overlap with 300 K curve which is accessing the energy states between 0.05 eV-0.4 eV. The histograms of 800 K-1400 K have slight overlap with this energy range, followed by no overlapping with the curves of 1600-2000K. This distribution reaffirms the fact that the starting structure is lost after 800 K and 600 K temperature for  $\text{Si}_4\text{C-b}$  and  $\text{Si}_7\text{C-a}$  clusters, respectively. Additionally, it is noted that the number of energy states acquired by  $\text{Si}_4\text{C-b}$  particularly within 0.05-0.8 eV of energy is much higher as compared to that of  $\text{Si}_7\text{C-a}$ . Also, as the potential energy increases, the histogram curves become more flat and broader for  $\text{Si}_7\text{C-a}$ .

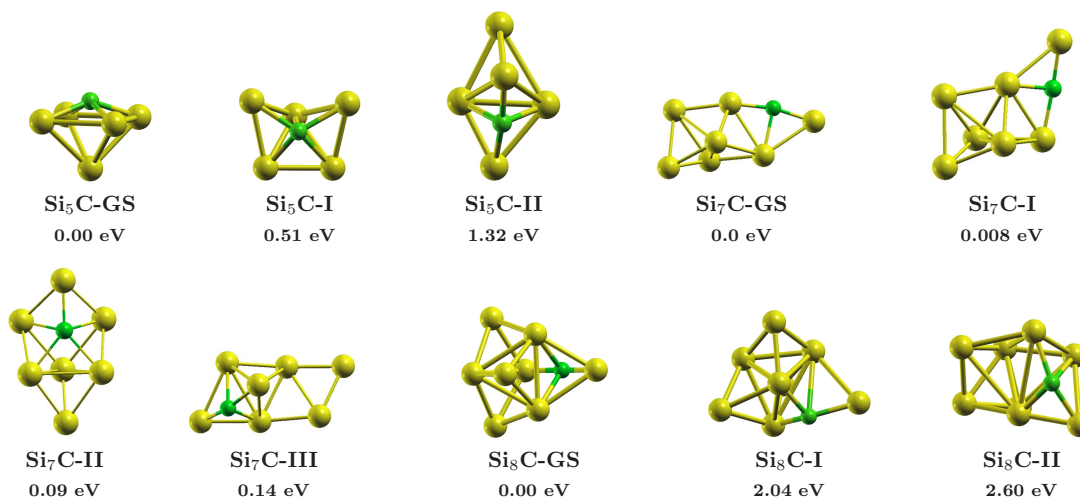

Figure S4. Higher energy conformations of  $\text{Si}_n\text{C}$  clusters with their relative energies (eV) observed at finite temperature

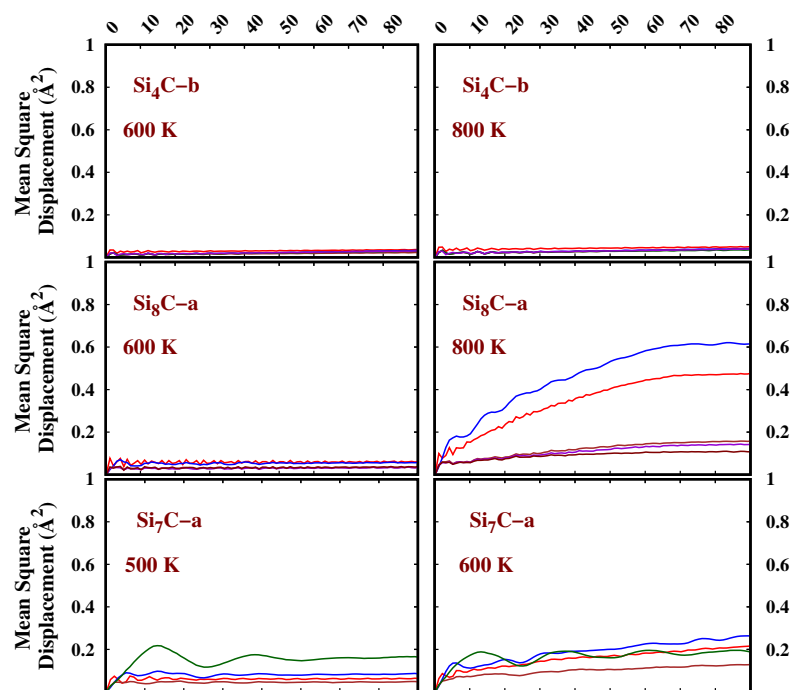

Figure S5. Mean square displacements of atoms in  $\text{Si}_n\text{C}$  clusters at 500, 600 and 800 K temperature.

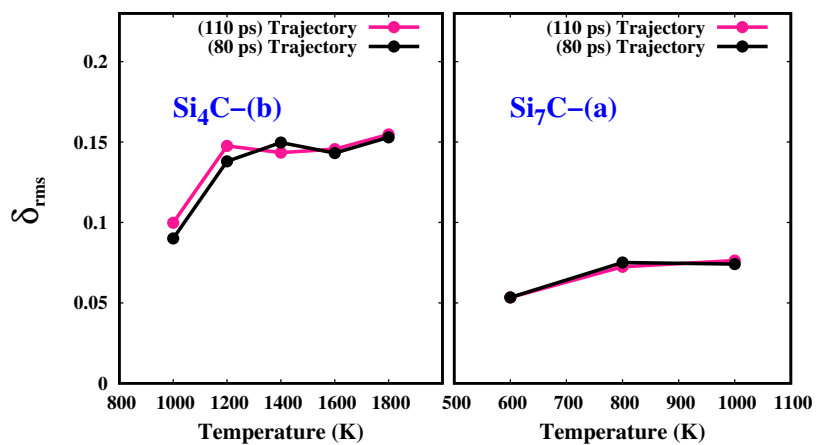

Figure S6.  $\delta_{\text{rms}}$  values for the extended trajectories of  $\text{Si}_4\text{C-b}$  and  $\text{Si}_7\text{C-a}$  clusters at 1000 K, 1200 K, 1400 K, 1600 K, 1800 K (RDP-1) and 600 K, 800 K, 1000 K (RDP-1) temperatures, respectively.

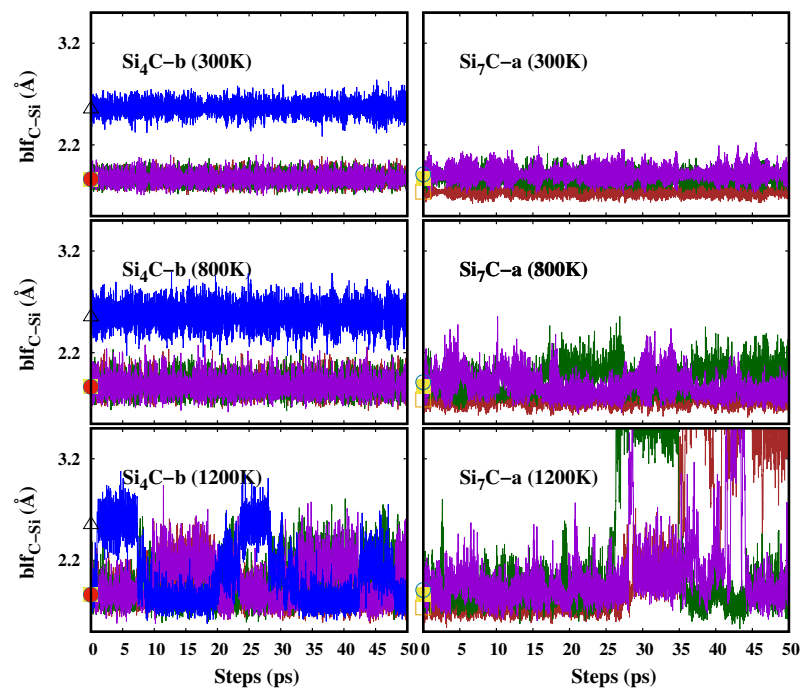

Figure S7. Fluctuations of C-Si interatomic distances as a function of time for  $\text{Si}_4\text{C-b}$  and  $\text{Si}_7\text{C-a}$  clusters. The bullet points in the plots represent corresponding C-Si interatomic bond distances of the starting geometry.

| <b>Cartesian coordinates of Si<sub>n</sub>C (n=3-8) conformations:</b> |           |           |           |                                              |           |           |           |
|------------------------------------------------------------------------|-----------|-----------|-----------|----------------------------------------------|-----------|-----------|-----------|
| <b>Si<sub>3</sub>C-a</b>                                               |           |           |           | <b>Si<sub>4</sub>C-a</b>                     |           |           |           |
| C                                                                      | 0.000000  | 0.000000  | 0.000000  | C                                            | 0.000000  | 0.000000  | 0.000000  |
| SI                                                                     | 0.000000  | 0.000000  | 1.782403  | Si                                           | 0.000000  | 0.000000  | 1.796030  |
| SI                                                                     | 0.487079  | 0.000000  | -1.715046 | Si                                           | 0.000000  | 0.093741  | -1.793588 |
| SI                                                                     | 1.933958  | 0.000021  | 0.267538  | Si                                           | -0.972833 | -1.795644 | -0.697398 |
|                                                                        |           |           |           | Si                                           | 0.971922  | -1.830154 | 0.602769  |
| <b>Si<sub>4</sub>C-b</b>                                               |           |           |           | <b>Si<sub>4</sub>C-I (b from Figure 4)</b>   |           |           |           |
| C                                                                      | 0.000000  | 0.000000  | 0.000000  | C                                            | -0.599785 | 0.499026  | -0.330450 |
| Si                                                                     | 0.000000  | 0.000000  | 1.863407  | Si                                           | 1.538753  | 0.141257  | -0.212287 |
| Si                                                                     | 1.827650  | 0.000000  | -0.363540 | Si                                           | -0.080017 | -1.148559 | 0.975922  |
| Si                                                                     | -0.442620 | 1.773343  | -0.363363 | Si                                           | -1.118747 | 1.081490  | 1.213197  |
| Si                                                                     | 1.401378  | 1.794135  | 1.149999  | Si                                           | -0.083485 | -0.287601 | -1.835512 |
| <b>Si<sub>4</sub>C-II (c from Figure 4)</b>                            |           |           |           | <b>Si<sub>4</sub>C-III (d from Figure 4)</b> |           |           |           |
| C                                                                      | 0.085290  | 1.113766  | -0.538323 | C                                            | 0.277004  | 0.216684  | 0.595519  |
| Si                                                                     | 1.563371  | 0.271265  | 0.019715  | Si                                           | 0.094347  | -0.076849 | -1.061965 |
| Si                                                                     | -0.215510 | -1.278763 | 0.682509  | Si                                           | -0.427743 | 0.107599  | 2.375583  |
| Si                                                                     | -0.955400 | 0.987957  | 0.947699  | Si                                           | 1.560341  | 1.102902  | -2.075557 |
| Si                                                                     | -0.428937 | -0.456770 | -1.419704 | Si                                           | -1.345408 | -1.226319 | 0.507260  |
| <b>Si<sub>5</sub>C-a</b>                                               |           |           |           | <b>Si<sub>5</sub>C-b</b>                     |           |           |           |
| C                                                                      | 0.000000  | 0.000000  | 0.000000  | C                                            | 0.000000  | 0.000000  | 0.000000  |
| SI                                                                     | 0.000000  | 0.000000  | 1.86460   | Si                                           | 0.000000  | 0.000000  | 1.914461  |
| SI                                                                     | 0.927718  | 0.000000  | -1.61743  | Si                                           | 1.171274  | 0.000000  | -1.514361 |
| SI                                                                     | 0.635395  | -1.813150 | 0.16928   | Si                                           | 0.585772  | 1.811643  | 0.200096  |
| SI                                                                     | 0.635395  | 1.813150  | 0.16928   | Si                                           | 0.585604  | -1.811720 | 0.200033  |
| SI                                                                     | 2.191357  | 0.000000  | 0.58384   | Si                                           | 2.162000  | -0.000111 | 0.738524  |
| <b>Si<sub>5</sub>C-I (Figure S4)</b>                                   |           |           |           | <b>Si<sub>5</sub>C-II (Figure S4)</b>        |           |           |           |
| C                                                                      | -0.106397 | 0.149051  | 0.824737  | C                                            | 0.008023  | -0.218782 | 1.071393  |
| SI                                                                     | 1.132632  | -1.273714 | 0.162754  | SI                                           | 1.293503  | -0.626402 | -0.238005 |
| SI                                                                     | -1.595721 | 1.111746  | 0.096440  | SI                                           | -1.274161 | -0.324962 | -0.468111 |
| SI                                                                     | 1.603084  | 1.013884  | 0.657904  | SI                                           | -0.462919 | -1.956330 | 0.834525  |
| SI                                                                     | 0.057699  | 0.276862  | -1.392802 | SI                                           | 0.306196  | 1.523084  | 1.106510  |
| SI                                                                     | -1.152194 | -1.192528 | 0.122990  | SI                                           | 0.133951  | 1.478178  | -1.693125 |
| <b>Si<sub>6</sub>C-a</b>                                               |           |           |           | <b>Si<sub>6</sub>C-I (b from Figure 8)</b>   |           |           |           |
| C                                                                      | 0.000000  | 0.000000  | 0.000000  | C                                            | 0.066888  | 1.113209  | 0.323814  |
| SI                                                                     | 0.000000  | 0.000000  | 2.055769  | SI                                           | 1.165239  | 1.667501  | -1.107486 |
| SI                                                                     | 1.934351  | 0.000000  | 0.696051  | SI                                           | 1.568950  | -0.326584 | -0.018544 |
| SI                                                                     | 1.280990  | -0.568862 | -1.503966 | SI                                           | 0.388739  | -2.328962 | 0.203860  |
| SI                                                                     | -1.057189 | -0.920260 | -1.503971 | SI                                           | -0.684992 | -0.243436 | -1.186120 |
| SI                                                                     | -1.848859 | -0.568863 | 0.696103  | SI                                           | -1.777458 | 1.330645  | 0.658572  |

|                                             |           |           |           |                                              |           |           |           |
|---------------------------------------------|-----------|-----------|-----------|----------------------------------------------|-----------|-----------|-----------|
| SI                                          | 0.309644  | -2.060365 | 0.440504  | SI                                           | -0.679940 | -0.584953 | 1.330394  |
| <b>Si<sub>6</sub>C-II (c from Figure 8)</b> |           |           |           | <b>Si<sub>6</sub>C-III (d from Figure 8)</b> |           |           |           |
| C                                           | -0.996889 | 0.081231  | 0.054174  | C                                            | -0.082193 | 0.637385  | -0.652488 |
| SI                                          | 0.617148  | 0.081280  | -1.267678 | SI                                           | 0.176542  | -1.758492 | 0.872734  |
| SI                                          | 1.698599  | -1.776425 | -0.161190 | SI                                           | -1.247435 | -0.883254 | -1.185142 |
| SI                                          | -0.759700 | -1.801022 | -0.055423 | SI                                           | -0.148419 | 2.359503  | 0.051494  |
| SI                                          | -2.134318 | 1.517646  | 0.176282  | SI                                           | 1.185818  | -0.726554 | -1.350152 |
| SI                                          | 0.279208  | 2.007940  | 0.100723  | SI                                           | 1.298984  | 0.457678  | 0.874044  |
| SI                                          | 0.724872  | -0.050533 | 1.224776  | SI                                           | -1.211571 | 0.294350  | 1.043885  |
| <b>Si<sub>7</sub>C-a</b>                    |           |           |           | <b>Si<sub>7</sub>C-b</b>                     |           |           |           |
| C                                           | 0.000000  | 0.000000  | 0.000000  | C                                            | 0.000000  | 0.000000  | 0.000000  |
| SI                                          | 0.000000  | 0.000000  | 1.739839  | SI                                           | 0.000000  | 0.000000  | 1.738353  |
| SI                                          | 0.000000  | 0.311449  | -1.842250 | SI                                           | 0.409665  | 0.000000  | -1.743222 |
| SI                                          | 1.180958  | 1.498951  | 0.078564  | SI                                           | 1.951056  | 0.464197  | 0.157717  |
| SI                                          | 3.066102  | 2.669294  | -0.591567 | SI                                           | 1.137074  | 0.666121  | -3.816800 |
| SI                                          | 0.478646  | 2.814950  | -1.811979 | SI                                           | 2.719989  | -0.716760 | -1.933200 |
| SI                                          | 2.471979  | 3.117379  | -3.030983 | SI                                           | 3.584626  | 0.915018  | -3.396773 |
| SI                                          | 2.322654  | 0.927042  | -2.181402 | SI                                           | 2.140056  | 1.883862  | -1.802807 |
| <b>Si<sub>7</sub>C-I (Figure S4)</b>        |           |           |           | <b>Si<sub>7</sub>C-II (Figure S4)</b>        |           |           |           |
| C                                           | 0.000000  | 0.000000  | 0.000000  | C                                            | 0.000000  | 0.000000  | 0.000000  |
| Si                                          | 0.000000  | 0.000000  | 1.739839  | Si                                           | 0.000000  | 0.000000  | 2.053402  |
| Si                                          | 0.000000  | 0.311449  | -1.842250 | Si                                           | 1.977495  | 0.000000  | 0.635373  |
| Si                                          | 1.180958  | 1.498951  | 0.078564  | Si                                           | 0.250688  | 1.593114  | -1.312438 |
| Si                                          | 3.066102  | 2.669294  | -0.591567 | Si                                           | 0.865761  | -0.802495 | -1.427258 |
| Si                                          | 0.478646  | 2.814950  | -1.811979 | Si                                           | -1.475691 | 1.401013  | 0.366326  |
| Si                                          | 2.471979  | 3.117379  | -3.030983 | Si                                           | -0.833496 | 2.275228  | 2.580954  |
| Si                                          | 2.322654  | 0.927042  | -2.181402 | Si                                           | 0.867436  | 2.220501  | 1.048775  |
| <b>Si<sub>7</sub>C-III (Figure S4)</b>      |           |           |           | <b>Si<sub>8</sub>C-a</b>                     |           |           |           |
| C                                           | 0.000000  | 0.000000  | 0.000000  | C                                            | 0.000000  | 0.000000  | 0.000000  |
| Si                                          | 0.000000  | 0.000000  | 1.788803  | SI                                           | 0.000000  | 0.000000  | 1.787863  |
| Si                                          | 0.629104  | 0.000000  | -1.766032 | SI                                           | 0.000000  | 0.094597  | -1.854562 |
| Si                                          | 0.940861  | -1.699445 | -0.166599 | SI                                           | -1.965298 | 1.451796  | -2.097926 |
| Si                                          | 1.964663  | 0.705091  | 0.307208  | SI                                           | -1.382527 | 1.536359  | 0.243497  |
| Si                                          | 2.725233  | -1.339525 | 1.441943  | SI                                           | 1.962725  | 1.455673  | -2.097832 |
| Si                                          | 3.108634  | -2.993528 | 2.925757  | SI                                           | 1.379665  | 1.539207  | 0.243319  |
| Si                                          | 1.107196  | -3.180165 | 1.724631  | SI                                           | -0.003356 | 3.491955  | 0.594089  |
| <b>Si<sub>8</sub>C-b</b>                    |           |           |           | <b>Si<sub>8</sub>C-I (Figure S4)</b>         |           |           |           |
| C                                           | 0.000000  | 0.000000  | 0.000000  | C                                            | 1.121067  | 0.643310  | -1.120416 |
| SI                                          | 0.000000  | 0.000000  | 1.814750  | Si                                           | 2.357378  | -0.666777 | -1.691305 |
| SI                                          | 0.891500  | 0.000000  | -1.688200 | Si                                           | -0.654629 | 0.084525  | -1.417285 |

|                                       |           |           |           |    |           |           |           |
|---------------------------------------|-----------|-----------|-----------|----|-----------|-----------|-----------|
| SI                                    | -0.597869 | -1.661203 | -0.803419 | Si | -1.582336 | -1.790169 | -0.448860 |
| SI                                    | 1.948581  | -0.672522 | 0.335332  | Si | 0.654021  | -1.504906 | 0.323667  |
| SI                                    | -1.021410 | -3.779771 | 0.228627  | Si | -1.681123 | 1.973080  | -0.167919 |
| SI                                    | 0.273816  | -2.627877 | 1.841951  | Si | 0.690210  | 1.551316  | 0.408014  |
| SI                                    | 2.620452  | -2.821207 | 1.387996  | Si | 0.980343  | 0.124287  | 2.196511  |
| SI                                    | 1.239211  | -3.377540 | -0.406062 | Si | -1.243297 | -0.046473 | 1.276333  |
|                                       |           |           |           |    |           |           |           |
| <b>Si<sub>8</sub>C-II (Figure S4)</b> |           |           |           |    |           |           |           |
| C                                     | -0.696634 | 1.282243  | 1.435483  |    |           |           |           |
| Si                                    | 0.944606  | 2.154565  | 1.607493  |    |           |           |           |
| Si                                    | -1.460541 | -1.986586 | 0.172822  |    |           |           |           |
| Si                                    | -2.195967 | 0.659732  | 0.377833  |    |           |           |           |
| Si                                    | 2.038434  | -0.367360 | -1.459836 |    |           |           |           |
| Si                                    | -0.328514 | 1.809229  | -1.010760 |    |           |           |           |
| Si                                    | 0.757750  | -0.033149 | 1.117644  |    |           |           |           |
| Si                                    | 0.911309  | -2.081488 | 0.108472  |    |           |           |           |
| Si                                    | -0.369156 | -0.703305 | -1.527565 |    |           |           |           |
